# Supplementary material for: Secreted protein markers in oral squamous cell carcinoma (OSCC)
Source: Clin Proteomics. 2022 Feb 8;19:4. doi: 10.1186/s12014-022-09341-5 (PMC8903575; doi:10.1186/s12014-022-09341-5)
Supplement: Supplementary file 4 — Additional file 4: Table S3. String Interaction of 205 up regulated proteins at FC >+2 and P <0.01 in tumors as compared to NATs. [file 12014_2022_9341_MOESM4_ESM.xlsx]

## Sheet: Additional file 4. Table S3
Additional file 4. Table S3. Biological Function of 205 Up Regulated Proteins in tumors (FC: ≥+2, P ≤0.01 by Clue Go Analysis
GOID	GOTerm	Associated Genes Found
GO:0002474	antigen processing and presentation of peptide antigen via MHC class I	ERAP1, PSMB9, SEC13, SEC23A, SEC24C, SEC24D, TAP2
GO:0006403	RNA localization	CKAP5, FBL, NOP58, PNPT1, RANBP2, RFTN1, SEC13, SRSF1, SRSF9, TPR, UPF1, XPO1
GO:0006418	tRNA aminoacylation for protein translation	AARS1, CARS1, EPRS1, LARS1, TARS1
GO:0006487	protein N-linked glycosylation	GFPT1, LMAN1, MOGS, STT3A, TMEM165, UGGT1
GO:0006888	endoplasmic reticulum to Golgi vesicle-mediated transport	COPA, COPB1, COPB2, COPE, COPG1, FOLR2, GOLGB1, HYOU1, LMAN1, LMAN2, SEC13, SEC16A, SEC23A, SEC23B, SEC23IP, SEC24C, SEC24D, TFG
GO:0006890	retrograde vesicle-mediated transport, Golgi to endoplasmic reticulum	COPA, COPB1, COPB2, COPE, COPG1, KLC1, LMAN2, SURF4
GO:0006891	intra-Golgi vesicle-mediated transport	COPA, COPB1, COPB2, COPE, COPG1, GOLGA3
GO:0006892	post-Golgi vesicle-mediated transport	CORO7, CSK, MACF1, MYO1B, SCAMP1, SCAMP3, SEC16A
GO:0006900	vesicle budding from membrane	[FOLR2, LMAN1, MX1, SEC13, SEC16A, SEC23A, SEC23B, SEC23IP, SEC24C, SEC24D, TFG]
GO:0006986	response to unfolded protein	[AGR2, DNAJB11, DNAJC3, EIF2AK2, GFPT1, HYOU1, MANF, MYDGF, PDIA5, PTPN1, SRPRA]
GO:0009615	response to virus	[ADAR, DNAJC3, EIF2AK2, HNRNPUL1, IFI16, MX1, MYDGF, NPC2, NPLOC4, OAS2, PLSCR1, PTPRC, STAT1, ZC3HAV1]
GO:0018126	protein hydroxylation	[CRTAP, P3H1, P4HA1, PLOD1, PRDX4]
GO:0018208	peptidyl-proline modification	[CRTAP, FKBP10, FKBP11, P3H1, P4HA1, PPIL1, PRDX4, RANBP2]
GO:0019886	antigen processing and presentation of exogenous peptide antigen via MHC class II	[AP2A2, KLC1, SEC13, SEC23A, SEC24C, SEC24D]
GO:0030968	endoplasmic reticulum unfolded protein response	[AGR2, DNAJB11, DNAJC3, EIF2AK2, GFPT1, HYOU1, MYDGF, PDIA5, PTPN1, SRPRA]
GO:0031295	T cell costimulation	[CSK, PAK2, PTPN6]
GO:0034381	plasma lipoprotein particle clearance	[AP2A2, CNPY2, CSK, EHD1, HDLBP, NPC2]
GO:0034976	response to endoplasmic reticulum stress	[AGR2, CCDC47, DNAJB11, DNAJC3, EIF2AK2, GFPT1, HYOU1, MANF, MYDGF, NPLOC4, PDIA5, PTPN1, RCN3, SDF2L1, SEC16A, SRPRA, UGGT1]
GO:0035456	response to interferon-beta	[IFI16, PLSCR1, PNPT1, STAT1]
GO:0035966	response to topologically incorrect protein	[AGR2, DNAJB11, DNAJC3, EIF2AK2, GFPT1, HYOU1, MANF, MYDGF, PDIA5, PTPN1, SDF2L1, SRPRA, UGGT1]
GO:0045047	protein targeting to ER	[RPL4, RPL5, RPS27, SEC61A1, SPCS1, SRP72, SRPRA]
GO:0045069	regulation of viral genome replication	[ADAR, EIF2AK2, IFI16, MX1, OAS2, PLSCR1, ZC3HAV1]
GO:0048002	antigen processing and presentation of peptide antigen	[AP2A2, ERAP1, KLC1, PSMB9, SEC13, SEC23A, SEC24C, SEC24D, TAP2]
GO:0048193	Golgi vesicle transport	[COPA, COPB1, COPB2, COPE, COPG1, CORO7, CSK, FOLR2, GOLGA3, GOLGB1, HYOU1, KLC1, LMAN1, LMAN2, MACF1, MYO1B, SCAMP1, SCAMP3, SEC13, SEC16A, SEC23A, SEC23B, SEC23IP, SEC24C, SEC24D, SNX2, SURF4, TFG]
GO:0048525	negative regulation of viral process	[EIF2AK2, IFI16, MX1, OAS2, PLSCR1, STAT1, ZC3HAV1]
GO:0050658	RNA transport	[CKAP5, PNPT1, RANBP2, RFTN1, SEC13, SRSF1, SRSF9, TPR, UPF1, XPO1]
GO:0050792	regulation of viral process	[ADAR, EIF2AK2, IFI16, IGF2R, MX1, OAS2, PLSCR1, STAT1, ZC3HAV1]
GO:0051607	defense response to virus	[ADAR, DNAJC3, EIF2AK2, IFI16, MX1, MYDGF, NPLOC4, OAS2, PLSCR1, PTPRC, STAT1, ZC3HAV1]
GO:0051650	establishment of vesicle localization	[AP3M1, APEX1, FOLR2, LMAN1, MX1, MYO1B, MYO1G, SEC13, SEC16A, SEC23A, SEC23IP, SEC24C, SEC24D, TFG]
GO:0051656	establishment of organelle localization	[AP3M1, APEX1, COPG1, FOLR2, LMAN1, MX1, MYH10, MYO1B, MYO1G, S100A13, SEC13, SEC16A, SEC23A, SEC23IP, SEC24C, SEC24D, STXBP2, TFG, XPO1]
GO:0051668	localization within membrane	[PTPRC, RFTN1, SEC13, SEC23A, SEC23B, SEC24C, SEC24D]
GO:0055129	L-proline biosynthetic process	[ALDH18A1, OAT, PYCR1]
GO:0060337	type I interferon signaling pathway	[ADAR, MX1, OAS2, PTPN1, PTPN6, STAT1]
GO:0070972	protein localization to endoplasmic reticulum	[RPL4, RPL5, RPS27, SEC16A, SEC61A1, SPCS1, SRP72, SRPRA]
GO:0071426	ribonucleoprotein complex export from nucleus	[RANBP2, SEC13, SRSF1, SRSF9, TPR, UPF1, XPO1]
GO:0071826	ribonucleoprotein complex subunit organization	[ADAR, EIF2S2, EIF3L, KLC1, PRKDC, PRPF8, RPL5, RPS27, SF3B1, SNRNP200, SRSF1, SRSF9]
GO:0090110	COPII-coated vesicle cargo loading	[SEC13, SEC23A, SEC23B, SEC24C, SEC24D]
GO:0090114	COPII-coated vesicle budding	[FOLR2, LMAN1, SEC13, SEC16A, SEC23A, SEC23B, SEC23IP, SEC24C, SEC24D, TFG]
GO:1903078	positive regulation of protein localization to plasma membrane	[AGR2, ITGA3, LRP1]
