# Supplementary material for: Secreted protein markers in oral squamous cell carcinoma (OSCC)
Source: Clin Proteomics. 2022 Feb 8;19:4. doi: 10.1186/s12014-022-09341-5 (PMC8903575; doi:10.1186/s12014-022-09341-5)
Supplement: Supplementary file 6 — Additional file 6: Table S5. 1724 secretome proteins were identified (˃5 average counts) in all HNSCC secretome. [file 12014_2022_9341_MOESM6_ESM.xlsx]

## Sheet: Additional file 6. Table S5
Additional file 6: Table S5. HNSCC Cell Lines Secrotome data (˃5 average counts)
Proteins	Averages normalized count
HSP90AA1	828.876
FLNA	796.924
PLEC	758.378
FLNB	614.378
ACTN4	586.275
AHSG	545.654
AGRN	539.99
LAMC2	529.403
HSPA8	521.406
PKM;PKLR	489.558
GAPDH;GAPDHS	470.721
ENO1	453.648
HSP90AB1	441.46
C3;METTL18	438.987
FAT2	431.831
	414.762
LAMA5	401.39
AHNAK;NRIP1	378.751
HSPG2	377.155
ACTB;ACTG1;ACTG2	369.669
EEF2	365.941
LAMB3	352.124
FASN	334.193
ALDOA;ALDOB	323.2
LAMA3	321.666
MYH9;MYH7;MYH8;MYH13;MYH6;MYH1	320.133
SPTAN1	307.819
LAMC1	303.153
CLTC	292.994
ACTN1	288.666
HSPA5	287.538
CLSTN1	287.418
HSPA1B;HSPA1A	279.727
THBS1	279.179
FN1	270.261
LGALS3BP	269.247
	260.797
HNRNPA2B1	256.814
SPTBN1	256.426
TGFBI	253.753
HSPA4	252.36
EEF1A1;EEF1A1P5	250.757
MSN	248.867
TKT	248.301
NCL	248.179
CFH;CFHR1;CFHR3;CFHR2	239.396
PPIA	238.358
YWHAZ	229.36
VCL	227.337
CFL1	225.627
LMNA	225.399
LDHA;LDHAL6A;LDHC	225.26
LAMB1	219.173
HSP90B1;HSP90B2P	212.715
PGK1	206.865
PDIA3	205.525
APP	203.938
TPI1	199.925
COL12A1	195.76
VCP	195.452
IQGAP1;IQGAP3	191.348
TLN1	188.98
FSCN1	188.422
	185.167
YWHAE	183.222
HNRNPA1	183.125
	179.619
EZR	178.491
GSTP1	176.687
PRDX1	173.619
GPC1	173.612
HSPH1	169.207
KRT8;KRT84	166.408
APLP2	164.548
TUBB4B	164.157
PYGB	158.383
GANAB	154.482
KTN1	154.161
P4HB	154.133
PLAU	152.806
DDB1	150.479
TARS;TARS2	148.75
PFN1	146.733
CALR	143.161
EFEMP1	139.629
SFN	138.653
GPI;SIX5	136.744
HMGB1;HMGB1P1	135.574
STIP1	135.261
DYNC1H1	134.963
LDHB	133.659
PYGL	132.572
FKBP4	131.686
RPS27A	130.923
CTSD	130.274
MMP13	126.655
AFP	124.772
PTPRF	123.453
PSAP	122.48
KRT1	119.951
C1R	119.115
TUBA1C	116.976
PGAM1;PGAM4	116.385
EEA1	115.413
TINAGL1	115.057
EPRS	114.904
TPP2	114.903
TPM3	113.87
EIF5A;EIF5AL1	112.586
WDR1	111.826
QSOX1	111.502
IGFBP7	110.92
NPEPPS;NPEPPSL1	110.291
SERPINE1	109.509
NME2	108.67
PLS3	107.383
FAT1;FAT3	107.305
UBA1	106.169
CD44	105.892
PA2G4	103.936
CAP1;CAP2	103.003
PDIA4	102.135
SFPQ	100.504
IGFBP3	100.295
ALCAM	98.8782
	98.0392
MAN2A1;MAN2A2	97.5214
	97.0246
EIF3A	95.8438
EIF3B	95.6988
MMP1	95.2066
PABPC1;PABPC3;PABPC1L;PABPC5	95.1857
FABP5;FABP5P3	95.0619
HNRNPK	94.9291
TFRC	94.5927
G6PD	93.7808
PXDN	92.8862
GSN	92.7363
PFAS	92.0357
NUMA1	91.2435
ITIH2	90.6759
GARS	90.4742
PPIB	90.4506
TPR	90.0691
KRT18	89.4189
IPO5	88.7381
LCN2	86.6184
CD109	85.9657
HNRNPD	85.0874
CTTN	84.8268
CTNNA1;CTNNA2;CTNNA3	82.6019
GRN	81.4613
DPP3	80.5073
PGD	80.49
IGF2R	80.4401
EEF1G	80.4193
ACLY	80.0806
SYNCRIP	80.046
MAP4	79.9909
AARS	78.4665
ILF3	78.3379
GDI2	78.2332
PEBP1	77.3939
HSPD1	76.7816
AHCY	76.5928
TAGLN2	76.3818
LAMB2;LAMB4	75.8198
NRDC	75.4824
KRT10;KRT28;KRT25;KRT27;KRT36;KRT32;KRT37;KRT38	75.1667
FBLN1	74.8899
MACF1	74.6473
EGFR;ERBB2;ERBB4	74.3369
KHSRP	74.3273
PDLIM1	74.2605
PPL	74.1896
COL7A1	73.9159
PLOD1	73.7244
NUCB1	73.529
CCT3	72.3425
LOXL2	72.2156
PSMA7;PSMA8	72.078
LTA4H	72.0484
CCT8	71.8374
CST3	71.4883
YWHAB	71.4237
KPNB1	71.0218
CTSB	70.9968
SF3B3	69.9649
CLIC1	69.7847
C1S;MASP1	69.6726
PCSK9	69.4676
LSR	69.1449
NPM1	69.1445
COL4A2	69.0324
PSMA6	68.9473
CAND1;CAND2	68.8648
DHX9	68.8496
PLOD3	68.5963
PDCD6IP	66.7762
IDH1	66.7139
PRKDC	66.6513
KRT2	66.3158
DSG2	65.8168
XRCC5	65.5635
EIF4G1	65.5546
KRT5	65.3372
LTBP2	64.9993
PSMD2	64.7022
ATRN;ATRNL1	64.6851
FBN2	64.6371
KRT17;KRT23	64.3582
TXNRD1	64.3299
DSP	64.3255
YWHAQ	64.2537
PARK7	63.8514
RCC2	63.4996
G3BP1	63.4316
PRDX6	63.3791
NASP	63.0932
PSMA1	62.6643
LTBP3	62.1435
CLU	62.1415
LAMA1	62.0299
SPOCK1	61.9159
IARS	61.362
TRIM28	61.2146
	61.2062
GSTO1	60.9194
CCT2	60.8618
PLG	60.7268
SND1	60.7141
PPA1	60.6956
HNRNPA3	60.4276
CAPN1	60.3552
TALDO1	59.9298
MDH2	59.5961
HNRNPL	58.7747
KRT9	58.6396
DAG1	58.3867
CARS	58.2795
WARS	57.7235
PTK7	57.4278
PARP1	57.3923
HSPA9	57.3871
CSE1L	57.2877
EIF3C;EIF3CL	56.8734
CTSV;CTSK	56.7113
HNRNPC;HNRNPCL1;HNRNPCL2;HNRNPCL4;HNRNPCL3;RALYL	56.5608
VPS35	56.482
DIAPH1	56.3618
SPINT1	56.3292
PSMA3	56.2674
ATIC	56.262
LCP1	55.8091
SERPINH1	55.0026
EIF4A1	54.8706
VARS	54.8636
SSB	54.7666
SF3A1	54.6988
YBX1	54.2486
RPSA	53.8313
FST	53.8232
RPL10A	53.7613
GOT2	53.7366
LASP1	53.5525
LGALS1	53.4922
RAN	53.1934
LMNB1	53.0888
PSAT1	52.8292
RACK1	52.7906
HEXB	52.7126
SERPINB5	52.5067
IGFBP6	52.0104
MCM6	51.7496
PSMB1	51.4423
HDGF	51.3485
MET;FRK;SRMS	51.2666
	51.2007
PSMA5	51.1454
TNC	51.1003
MTHFD1;MTHFD1L	50.6026
FSTL1	50.4032
HSPB1	50.382
FUBP1	50.3319
EEF1D	50.1602
BCAM	49.8362
HMGB2	49.7283
CRIM1	49.4374
DSC3	49.2647
RRBP1	49.1987
PTPRK	49.1276
GALNT2	49.0648
ANXA2	49.0124
SLC3A2	48.9837
	48.6325
SET;SETSIP	48.5573
SUPT16H	48.4106
UGGT1;UGGT2	48.3876
ECM1	47.9835
YWHAG	47.7938
CCT5	47.5413
NAMPT	47.5154
ALDOC	47.5125
HNRNPU	47.4933
SERPINA1	47.4554
JUP	47.3066
GART	47.1445
CTSH	47.1008
ERAP1	47.0794
MMP2	47.0361
CCT7	46.9053
CAST	46.6782
PTBP1	45.9095
HDLBP	45.5059
PPP2R1A	45.4849
CLIP1	45.4598
CCT4	45.4342
PRKCSH	45.265
PCBP1;PCBP4	45.2447
TIMP1	45.1317
CAD;CPS1	45.0522
AKAP12	44.9436
FAM3C	44.8662
CTSC	44.682
SERBP1	44.6705
ARHGDIA	44.5506
RNPEP	44.4465
TCP1	44.2693
IPO7	44.2582
AKR1C2	43.9971
RANBP1;PKIB	43.7968
KLK5	43.6764
PSMA2	43.6617
SERPINB2	43.3629
GGH	43.2139
B2M	43.053
CALD1	42.8831
NPC2	42.872
SOD1	42.5375
ITIH4	42.3817
AGL	42.3383
HBA1;HBZ	42.2325
ALDH1A3	42.1309
LDLR	42.0186
COL5A1	41.8879
HNRNPH1	41.8783
ALB	41.8756
COPB2	41.8057
PLXNB2	41.7269
PLCB3	41.6021
TPM4;CCDC57	41.3548
RPL12	41.348
SERPINF2	41.3028
MATN2	40.9695
YWHAH	40.9626
CACYBP	40.761
CAPZB	40.7502
KARS	40.7413
BASP1	40.6878
TPT1;TPT1P8	40.6818
MCM2	40.5795
EXT2	40.4637
SNRNP200	40.3844
HSPE1	40.3015
ACO1;PDE2A	40.2953
ST13;ST13P4	40.0774
UBR4	39.9301
APEX1	39.911
KLK10	39.9048
SF3B2	39.9007
EFHD2;EFHD1	39.6012
DUT	39.5804
CBR1	39.2823
AKR1B1	39.215
XRCC6	38.9242
COPA	38.7741
SDF4	38.6245
MDH1	38.5222
FKBP3	38.5114
	38.373
RPL5	38.2864
TUBA1B;TUBAL3;TUBA4B	38.1792
COTL1	37.857
HBB;HBD	37.741
LMNB2	37.6287
ERP29	37.5572
CAPZA1	37.4654
DDX39B	37.326
JAG1	37.3137
HYOU1	37.2673
DKK1;DKK2	37.1348
NARS	37.0897
SAFB	37.0122
PTPRS	36.9183
IDE	36.7769
COL6A1	36.5759
	36.5189
RAD23B	36.5175
ECM29	36.4383
PREP	36.3849
HNRNPF	36.3265
CDH3	36.3245
GOT1	36.2937
HARS	36.1012
TXN	36.0483
INHBA	36.0234
PCNA	35.7843
GLUD1;GLUD2	35.597
TUBB	35.4352
DDX17	35.3825
XPO1	35.3761
APEH	35.3074
RDX	35.2261
RNH1	35.2193
KIF5B	35.209
RBMX;RBMXL2;RBMXL3	35.1996
	34.9485
DDT;DDTL	34.9012
SEMA4B	34.8681
RPS3	34.7203
HIST1H4A	34.5939
HUWE1	34.512
CNDP2	34.4495
EIF4B	34.4332
PSMB5	34.3641
MAT2A;MAT1A	34.3003
NUDC	34.2109
CCT6A	34.1795
LGMN	34.166
THBS2	34.1382
PSMD1	34.083
ITGB4	34.01
GCLC	33.8925
ANXA1	33.8835
	33.8307
CDH1	33.7798
MANBA	33.7158
GLG1	33.7023
PSME1	33.5817
LIMA1;LIMD2	33.5252
GDI1	33.4798
BMP1;TLL1	33.452
MAPRE1	33.4392
TPP1	33.3874
PNP	33.381
ARHGDIB	33.3208
PSMA4	33.2896
SUPT6H	33.232
MMP10	33.1487
S100A11	33.0903
RPLP2;RPLP1	32.9899
PSMB2	32.9104
HEXA	32.8836
IGFBP2	32.8341
HNRNPAB	32.8162
CTSZ	32.7449
RPS12	32.6191
CAPRIN1	32.5527
SDC4	32.5521
ARCN1	32.5453
ACTR3;ACTR3B;ACTR3C	32.5267
ACO2	32.4811
PRDX5	32.4239
AP2B1	32.3427
GLO1	32.3106
LRRFIP1	32.3095
	32.1347
ACTA1;ACTC1;ACTG2;ACTA2	32.0475
AKR1A1	32.0412
THOP1	31.8939
CALM3;CALM2;CALM1;TNNC2	31.8744
TJP1	31.8642
NONO	31.8526
FTH1	31.6556
	31.4452
PUF60	31.4341
PSMB3	31.4082
NACA	31.1232
OTUB1	31.0657
DKK3	31.0221
RARS	30.9529
KNG1	30.9049
HLA-A	30.8312
DSTN	30.6358
CFB	30.6054
EIF5B	30.5956
HINT1	30.5708
SF3B1	30.4112
TIMP2	30.4036
MKI67	30.3986
A1BG	30.3537
ME1	30.0414
HMGCS1;HMGCS2	30.0316
GSR	29.9784
CLIC4	29.9325
MARCKS	29.8001
PAICS	29.7948
EIF2A	29.7839
PGM1	29.724
KYNU	29.4918
GOLM1	29.4109
USP7	29.4064
FH	29.4011
STC2	29.399
FUS	29.3918
QARS	29.367
SEMA7A	29.3556
EIF2S3;EIF2S3L	29.3553
CKAP5	29.2352
DBNL	29.2172
PDIA6	29.1779
	29.1654
NSFL1C	29.1152
USP14	29.0815
CHORDC1	28.9434
NAP1L4	28.9361
HNRNPUL1	28.9196
PLIN3	28.8861
USP5	28.8273
NID1	28.779
CTSA	28.765
HSP90AB2P	28.7333
MXRA5	28.6652
ANP32B	28.6562
PRMT1;PRMT8	28.5923
EIF2S1	28.5521
PTGFRN	28.5146
GGCT	28.4558
TNKS1BP1	28.4364
TGM2;TGM5;TGM4	28.3864
RCN1	28.3803
TPD52L2	28.2986
KLK6	28.2862
SMC1A	28.2598
NAXE	28.25
FGFBP1	28.2325
PRPF8	28.1502
PRDX2	28.0056
GSPT1;GSPT2	28.0034
BLVRB	27.9772
STAT1	27.9559
SERPIND1	27.7676
ERAP2	27.7552
PFKP	27.7306
CST6	27.6408
MVP	27.6132
SERPINB6	27.593
PSMB8	27.5268
CA2	27.4328
EIF3D	27.402
CTNNB1	27.207
SHMT2	27.1345
PAFAH1B1	27.1338
UCHL3	27.0734
HMGB3	27.0632
LAD1	27.0321
ADH5	26.9944
PTMA	26.9244
PSMB7	26.8811
GSS	26.7873
PGM2	26.7586
STRAP	26.68
ANP32A;ANP32D;ANP32C	26.6519
SPAG9;MAPK8IP3	26.6435
NAP1L1	26.5862
CSDE1	26.5689
KRT19	26.502
PSMB4	26.5003
HK1;HKDC1;HK3	26.4354
SCRN1	26.4122
CYCS	26.3557
GDF15	26.3438
CNN2	26.3407
UPF1	26.2689
COL18A1	26.2492
EIF3G	26.2458
MANF	26.1999
CDC37	26.1649
YARS	26.1434
ERP44	26.1251
RBBP4	26.0642
SMC3	26.0085
PLOD2	25.9923
PRSS23	25.9374
OAT	25.9267
COL17A1	25.8875
UBA2	25.8826
ACP1	25.8553
DYNLL1	25.848
ELAVL1	25.7527
PSME2	25.7509
FUCA2	25.7006
TJP2	25.6668
EIF3L	25.6292
PAM	25.5908
SEPT9	25.5234
EFTUD2	25.5105
GNS	25.4409
RUVBL1	25.3161
	25.2918
PGLS	25.2634
DNMT1	25.2579
IARS2	25.2458
LARS	25.201
RUVBL2	25.1889
NUDT5	25.1408
QSOX2	25.0883
AIMP1	24.8305
CPA4	24.8052
PCMT1	24.7145
SORD	24.6798
PLAA	24.4911
RANGAP1	24.4828
DPP9	24.4628
OLA1	24.4109
RAB7A	24.3917
	24.3741
GALNT7	24.3137
GMPS	24.2988
ADAM10	24.2395
SRRT	24.2141
HNRNPR	24.2029
RAC1;RAC3	24.1795
ACTR2	24.1226
TSN	24.1121
BAG3	24.0117
ARPC2	23.9812
RPLP0;RPLP0P6	23.9631
ARF3	23.8587
UBE2L3	23.8515
CAVIN1	23.7693
S100A2	23.7625
EXT1;EXTL1	23.6953
UBE2I	23.6704
EIF4H	23.5886
HNRNPDL	23.5411
ESD	23.5011
CMPK1	23.4965
HPRT1	23.4882
CSTB	23.4685
CDV3	23.3413
TCOF1	23.3346
OLFML2A	23.3062
SPARC	23.292
LRPPRC;PNPLA8	23.2165
STMN1	23.1803
ROCK2	23.1587
DNAJB1	23.1532
TNPO1	22.9066
APOH	22.8934
MIF	22.875
PTGES3	22.8547
VTN	22.7997
HNRNPM	22.7828
CALU	22.7505
EIF3I	22.7475
CTSL;CTSL3P	22.7047
GLOD4	22.6834
SERPINB1	22.6647
MAN2B1	22.6352
GLRX3	22.5677
SQOR	22.5618
U2AF2	22.5351
MCM4;MCM8	22.5075
TCERG1;TCERG1L	22.4667
ILF2	22.4639
COPB1	22.4424
DCTN1	22.4334
GRB2	22.3819
S100A10	22.3147
HLA-C	22.2851
SEC23B	22.2523
HCFC1	22.2068
CYR61	22.1985
AFM	22.1956
MMP7	22.1923
ACAT2	22.1487
NAA15;NAA16	22.1406
FAM49B;FAM49A	22.0612
SLK	21.9167
MAPK1	21.9048
SUB1	21.7607
SF1	21.7516
CAPN2	21.7144
TCEA1;TCEA2	21.6739
CRK	21.66
RPS19	21.6391
DDX1	21.575
CAPG	21.5644
FLNC	21.5257
FKBP1A	21.4998
LAP3	21.4912
COPG1	21.4673
TPM1	21.3863
	21.3692
EIF6	21.2995
TACSTD2	21.2757
CORO1C;CORO6	21.2351
PPP5C	21.1287
CD9	21.1013
SEPT7;SEPT14	21.0819
ACACA;ACACB	21.0451
USO1	20.9409
TXNDC5	20.7798
AK2	20.6919
FHL2	20.6414
NQO1	20.6022
SMC4	20.6012
PRPF19	20.5674
TES	20.5417
ATP6AP2	20.5319
AK1;AK5	20.5291
PPIF	20.4719
UGP2	20.3489
SNRPB;SNRPN	20.3462
RBM12	20.3328
KRT14;KRT20	20.3197
C1QBP	20.3131
LGALS3	20.2417
VIM;DES	20.1993
BTF3	20.1992
SAE1	20.1065
ITGA6	20.1037
TBCA	20.0378
EIF3J	20.026
COL4A1	19.9648
FAM129B	19.9445
RBM8A	19.9153
YAP1;MAGI1;MAGI2	19.8733
NEO1	19.8683
COMT	19.863
TXNDC17	19.832
TWF1	19.8298
	19.7829
RPS3A	19.7204
SUGT1	19.7018
TMPO	19.6805
RPS21	19.6213
SEPT2	19.5495
GM2A	19.5415
ERH	19.5302
ITIH3	19.5291
PITRM1	19.5125
TMEM132A	19.5074
SEC31A	19.4997
	19.4987
MAGOHB	19.4799
ATP1A1;ATP4A;ATP12A	19.4459
EIF5	19.4032
TTLL12	19.3941
UBE2N	19.3212
PRDX4	19.2606
SEC24C	19.2601
ELOB	19.2321
PPP2CA	19.2279
ALDH9A1	19.1689
CDH2	19.1624
ERO1A;ERO1B	19.0974
PPT1	19.0634
YBX3;YBX2	19.0524
ACOT7;ACOT7L	19.0468
FDPS	19.0462
PITPNB	19.0395
DCTPP1	19.0152
DARS	18.9676
LRP1;LRP1B	18.7781
ADK	18.7649
EIF2S2	18.6899
CLUH	18.5261
MTAP	18.5087
CYFIP1;CYFIP2	18.4814
DHX15	18.4661
HIST1H2BM;HIST1H2BL;HIST1H2BN;HIST1H2BH;HIST2H2BF;HIST1H2BC;HIST1H2BD;HIST1H2BK;H2BFS	18.3303
TGFB2	18.2502
GAA	18.2419
CSF1	18.2248
SPOCK2	18.2145
CSRP1	18.1949
CNBP	18.1801
PSMD11	18.1627
IGFBP4	18.1444
SDCBP	18.1317
GNPDA1	18.1135
SF3A3	18.1081
PRNP	18.045
NIT2	17.9962
PRSS22	17.9766
PCDH1	17.9673
PPP1CA	17.9527
CUL4B	17.9486
DNPEP	17.9349
RHOA	17.8989
KPNA2	17.8565
CAPNS1	17.8126
MYL12A;MYL12B	17.8106
COPS4	17.7387
CUL1;NFKBID	17.7233
PSMB6	17.708
PTGR1	17.6372
NUTF2	17.6049
DNAJC3	17.5707
CLTB	17.4962
FRAS1	17.4923
PRDX3	17.4046
PPM1G	17.3774
SSRP1	17.3488
NSUN2	17.3275
CNTN1	17.3031
PLTP	17.2591
PEPD	17.2545
PDLIM5	17.1812
NRP1	17.1652
SARG	17.1611
RTRAF	17.1505
EIF1AX	17.149
PABPC4;PABPC4L	17.0818
ECHS1	17.0446
FBN1	17.0381
PAK2	17.0215
ASS1	16.9276
UBE2V1	16.9182
PSMC2	16.8848
UBA6	16.883
COL5A2	16.8553
SNRPD2	16.8379
MYL6	16.7708
ARPC1B	16.725
ZYX	16.7145
NANS	16.7075
XPOT	16.6908
DLD	16.6893
PSMD5	16.5621
PCBP2;PCBP3	16.5572
CAB39;CAB39L	16.5347
IMPDH2	16.5346
CRKL	16.5133
L1CAM	16.5118
NRP2	16.4685
PSMD3	16.4655
SNRNP70	16.4564
SNRPA	16.4264
ALDH16A1	16.421
NMT1;NMT2	16.3974
CANT1	16.3339
EEF1B2	16.3328
TROVE2	16.3112
DDR1	16.2932
DPYSL3;DPYS	16.2664
NECTIN1	16.2509
ADSS;ADSSL1	16.2139
MDK	16.2123
KLK7	16.1677
IDI1;IDI2	16.1579
MAT2B	16.116
HSPA6;HSPA7	16.112
MCTS1	16.1067
ADSL	16.023
EDF1	16.0064
HGS	15.8964
NAPRT	15.8827
CFI	15.8799
API5	15.8619
XPO7	15.8385
RPS18	15.8142
SRSF1	15.8021
SARS	15.7997
NAA50	15.781
RPS16	15.7762
DLG1;DLG2;DLG4	15.7481
TXNL1	15.7293
RAB14	15.7173
PVR	15.6531
COPE	15.6502
RRM1	15.6422
VASP	15.6204
TFG	15.5845
MARS	15.5738
CLSTN3	15.5705
SEC23A	15.5445
PKP3	15.5204
MAMDC2	15.5123
ADGRG6	15.4544
UBE2K	15.4489
CBX3	15.3857
CCDC80	15.3816
NOMO2;NOMO1;NOMO3	15.3757
AKR1C1;AKR1C4	15.3366
PIN1;PIN1P1	15.3365
FARSB	15.331
DCTN2	15.2931
GBE1	15.2829
GAS6	15.2732
GNPNAT1	15.2535
UPP1	15.2503
ACTL6A;ACTL6B	15.2237
SLC9A3R1	15.2044
FTL	15.1718
PRCP	15.0754
MCM3	15.0439
OPLAH	14.9865
KHDRBS1;KHDRBS2;KHDRBS3	14.9697
TPD52	14.9442
SMC2	14.9413
SKP1	14.938
MATR3	14.9336
ENAH;EVL	14.9151
ARPC3	14.9052
PTPA	14.8551
SEMA3A	14.7621
GOLGA4	14.7499
ISYNA1	14.7366
SARNP	14.7328
DBI	14.6936
ADAM9	14.6773
RPL30	14.6501
S100A16	14.615
SNX2	14.6112
USP9X	14.6024
SBDS	14.5439
METAP2	14.5318
CD2AP	14.5119
PDAP1	14.5021
DENR	14.5019
MX1	14.4638
PPP1R12A	14.4279
PPIH	14.382
RPRD1B	14.3808
PSMD6	14.3703
EIF3M	14.3523
CORO1B	14.3242
PHGDH	14.3162
PDCD5	14.3032
CNN3	14.2612
VPS26A	14.2584
SART3	14.2455
MTPN	14.2368
NUCKS1	14.2195
CTGF	14.2165
AP1B1	14.1956
SUMF2	14.1753
TATDN1	14.175
MELTF	14.1682
GLB1;GLB1L	14.0207
SEPT11	14.0178
CREG1	14.0046
FKBP2	13.999
RBBP7	13.9917
MINPP1	13.9575
VPS29	13.9536
CPVL	13.9273
UBAP2L	13.9214
FAH	13.9139
AP2A1	13.9077
EVPL;EVPLL	13.9054
MYOF	13.8858
ELOC	13.8666
EPHB2;EPHB1;EPHA6;EPHA7	13.8177
BZW2	13.7766
JPT2	13.7285
PACSIN2	13.7163
VEGFC	13.6521
ARPC4	13.6209
TAGLN	13.5747
AXL	13.5516
NLN	13.5322
PPP3CA;PPP3CC	13.5275
PSMD9	13.5039
SAMD9	13.4963
F2	13.4487
SNRPF	13.4144
DNAJB11	13.414
JPT1	13.4122
UNC45A	13.3912
CMBL	13.3766
KRT6A;KRT6C	13.3685
IPO9	13.3579
EWSR1	13.3417
RCC1	13.3374
HNRNPUL2	13.3122
PFDN2	13.2879
TBL1XR1;TBL1X;TBL1Y	13.2722
SERPING1	13.2685
ALYREF	13.2552
PSPH	13.2409
LFNG	13.2278
RPS8	13.1981
GOLGB1;MPP6	13.1894
PROCR	13.148
NCBP1	13.127
DDX5	13.1036
SNCG	13.0656
MCM7	13.0296
BLVRA	13.0241
PLAT	13.0219
TWF2	12.992
EPS8L2	12.9581
ATXN2L	12.9568
PSMC1	12.9562
RECQL	12.9541
CSPG4	12.9219
VWA1	12.9177
SOD2	12.9027
PGM3	12.8386
RMDN1	12.8352
RAB2A	12.8289
SLPI	12.805
GBP1;GBP3	12.7938
PPFIA1;PPFIA2;PPFIA3	12.7933
PSME3	12.785
NUDCD1	12.7569
CS	12.7403
CIAPIN1	12.7332
BPNT1	12.7077
G3BP2	12.6783
XYLT2	12.6494
VAPA	12.6487
BANF1	12.607
GOLGA3	12.586
CCAR2	12.5216
MCM5	12.5013
MGAT5;CCDC126	12.4779
TP53BP1	12.4674
NAPA;NAPB	12.4563
SMARCC2	12.4358
STK24	12.4153
	12.4018
CNPY2	12.3774
DNAJC9	12.3629
SRSF9	12.3454
UFD1	12.2695
DAZAP1	12.2619
ATP6V1A	12.2562
RPS5	12.2417
AGA	12.2375
HSPA4L	12.2356
RPL11	12.226
RPA1	12.2044
SMS	12.2016
CTNND1	12.1896
PSMD13	12.179
SNRPD3	12.1767
HNRNPA0	12.1477
DYNLL2	12.1191
ACBD3	12.1164
POTEE;POTEF;POTEI;POTEKP	12.0962
RAP1GDS1	12.0746
MYDGF	12.051
ANXA8	12.0446
PTHLH	12.0351
AHSA1	12.0344
COPS2	12.0157
RAB11B;RAB11A	12.012
NUDT21	12.0033
DIP2B;DIP2A	11.9947
CALML3	11.9883
AREG	11.9651
UGDH	11.9577
PSMD12	11.9264
PDCD10	11.9129
GPS1	11.8408
IFI30	11.7377
AKR1C3	11.7375
AIP	11.7004
NEDD8	11.6811
BUB3	11.6101
RPS11	11.5939
NAGLU	11.5752
MAN2B2	11.5668
SEMA3B	11.5606
ISG15	11.5442
C21orf33	11.5427
ITPA	11.5162
LRRC47	11.5087
MESD	11.5017
HEBP1	11.4852
GCLM	11.4807
ARPC5	11.442
KCTD12;KCTD16	11.4258
HSPBP1	11.4235
USP15	11.3807
LTBP4	11.3321
BZW1	11.3272
TBCB	11.3272
DST	11.327
ETF1	11.3139
RAD50;ANKRD26	11.2814
BOLA2	11.2745
B4GALT1	11.2682
DNAJC7	11.2657
CRYZ	11.2646
ADI1	11.2201
EHD1	11.1873
NT5C2	11.1862
THUMPD1	11.184
DSC2	11.1732
HSPA2	11.1476
BLMH	11.1459
ERC1	11.12
OSBP;OSBP2	11.1073
SULF2	11.105
DDAH1	11.0895
PRMT5	11.077
EML4	11.0494
YKT6	11.0394
TSTA3	10.9873
HDAC2	10.9828
PPIL1	10.9672
PRKAR1A	10.9545
PTPN11	10.951
PNPO	10.9437
HIBADH	10.9189
GDA	10.8757
RPL22;RPL22L1	10.8751
PPA2	10.8186
CBFB	10.8118
GUSB	10.8077
SERPINE2	10.7987
AFAP1L2	10.7826
B4GAT1	10.7787
TMOD3	10.778
EML2	10.7746
RPS28	10.7553
SPTBN2	10.7401
PSMC3	10.7362
PDCD6	10.6952
SERPINB13	10.6923
XPNPEP1	10.6815
WDR12	10.6659
DNAJC8	10.6647
RPL23A	10.6546
NT5DC1	10.6531
COLGALT1	10.639
SCPEP1	10.6015
PSMC5	10.5936
EFNB1	10.5911
RNASET2	10.5862
	10.5656
HMGA1	10.5592
SWAP70	10.5341
OXCT1	10.512
IFIT3	10.5065
MRC2	10.4702
PAIP1	10.4549
VTA1	10.4354
RPS14	10.4343
TRAP1	10.4033
GRHPR	10.4017
FLII	10.392
COPS5	10.3881
DNASE2	10.3833
WDHD1	10.367
SHMT1	10.3582
SRP9	10.3175
EPPK1	10.3171
PSMB9	10.3061
CAT	10.2955
SIL1	10.2904
DTYMK	10.2556
GRPEL1	10.2421
DDX6	10.2362
NIF3L1;SOHLH2;CCDC169	10.2182
ITGB1	10.2168
SUMO2	10.2097
CPSF6	10.1796
HIST1H2AJ;HIST1H2AH;HIST2H2AA3;HIST1H2AG;H2AFJ;HIST2H2AC;HIST1H2AD;HIST1H2AA;H2AFX	10.1481
SERPINB7	10.1328
SNX3	10.1104
FARSA	10.0929
SGTA	10.0892
KPNA4	10.087
NAA25	10.0707
PGP	10.0687
DDX21;DDX50	10.0671
PFDN5	10.0373
ULBP2;RAET1G;RAET1L	10.0367
RAE1	10.0189
TRIM29	9.98607
SKIV2L2	9.93806
DDX42	9.9303
DDX3X;DDX3Y;DDX4	9.9278
NAGK	9.91886
THRAP3	9.91269
SNRPA1	9.90604
P3H1	9.87541
GCN1	9.86816
PSMD4;PIPSL	9.86274
ABHD14B	9.86144
S100A14	9.85303
TIAL1	9.84839
POFUT1	9.84666
	9.84132
SRSF3	9.81607
PLBD2	9.80929
STAT3	9.79798
OSTF1	9.76958
CAPZA2	9.76132
RPS10;RPS10P5	9.75202
SH3BGRL3	9.74816
CLTA	9.7387
NCAPD2	9.73764
FEN1	9.71233
PITHD1	9.68805
CLINT1	9.68584
SRI	9.67959
CPOX	9.67834
MMP14	9.67632
RPS17	9.65965
RPS20	9.64755
CXCL1	9.64462
AIFM1	9.63047
ASPH	9.61712
SDC1	9.60804
STAMBP	9.60487
RPS7	9.60284
LUC7L2;FMC1	9.5983
LAMA3	9.59463
RBM4;RBM4B	9.587
RPS4X;RPS4Y2	9.56561
PHPT1	9.56491
	9.55812
PFN2	9.52167
DNM1L	9.51115
RANBP3	9.50982
AHNAK2	9.50231
DPYSL2	9.47875
TSNAX	9.44141
HTRA1	9.44131
	9.44017
RANBP2;RGPD5;RGPD8;RGPD1;RGPD2;RGPD4	9.43748
DCUN1D1;DCUN1D2	9.394
NAA10;NAA11	9.39352
RPL27	9.39121
DBN1	9.37797
SORL1	9.37328
EIF4A3	9.37148
ZNF185	9.37073
RTCB	9.36731
PDXK	9.32639
C7orf50	9.32459
UBQLN1	9.31737
MGEA5	9.31058
TNPO3	9.30507
STAM	9.28841
RPS13	9.24254
PABPN1;PABPN1L	9.21797
PML	9.21351
PTPRZ1	9.20941
ENOPH1	9.20743
SAA1;SAA2	9.12858
AGO2	9.11095
CHMP4B;CHMP4BP1	9.09951
EIF2B1	9.08976
ATXN10	9.08701
GTF2I;GTF2IRD2;GTF2IRD2B	9.07333
ABCE1	9.03712
MSLN	9.02839
IVL	9.00325
FBLN1	9.00094
COL16A1	8.99601
RPS15	8.99376
SHTN1	8.97091
SH3KBP1	8.93954
QDPR	8.93107
F11R	8.92422
	8.90605
CTPS1	8.89356
	8.88494
CPPED1	8.88185
MBTPS1	8.87838
ECI1	8.83911
ST14	8.82808
EIF1;EIF1B	8.80645
NUCB2	8.80281
MAN1B1	8.7866
	8.76294
CPE	8.74504
AKR1B10	8.74208
DTD1	8.74063
SRP14	8.73099
DHX36	8.72456
CARHSP1	8.71899
CTSS	8.71897
BROX	8.71849
RABGAP1;RABGAP1L	8.71734
PMM2;PMM1	8.69867
ANKFY1	8.69368
BICD2	8.67821
ZNF207	8.6742
CKB	8.65051
PHF5A	8.60811
HNRNPH3	8.60736
UBE2V2	8.59903
GALNS	8.59308
LRRC59	8.59171
UAP1	8.55306
HADH	8.55036
HTATSF1	8.52389
GLUL	8.50473
LACTB2	8.50078
GLA	8.4959
ARPC1A	8.48668
UBFD1	8.48074
CSTA	8.46923
MYH10	8.44979
PCNP	8.44022
PAWR	8.43925
FAM129A	8.43778
MOB1A	8.42757
CRYBG1	8.42243
PAFAH1B3	8.3956
UFC1	8.39316
RBM3	8.37251
TGOLN2	8.371
RPLP1	8.36994
ATP6AP1	8.35528
XRN2	8.35077
GMPR2;GMPR	8.32218
IPO4	8.31869
SNU13	8.29415
	8.29138
SNX6	8.29054
LRBA	8.26845
CDA	8.26269
LYPLAL1	8.26101
RPS15A	8.25554
PTX3	8.23613
C9orf64	8.2338
NCKAP1	8.20552
SPINT2	8.19128
TRIR	8.17288
DLL1	8.16937
PSMD10	8.14963
NOV	8.14949
PLPBP	8.14938
WDR5	8.14897
AMIGO2	8.14189
RPL23	8.11145
PCDH7	8.10944
EIF3F	8.10539
PTPRJ	8.09938
B4GALT5;B4GALT6	8.09517
MEMO1	8.08028
ACTR1A	8.06625
PYCARD	8.0448
EIF4G2	8.04255
DCBLD2	8.01859
EIF3E	7.9965
NAE1	7.98877
STX7	7.98827
DNAJA1;DNAJC5	7.9868
SIRPA;SIRPB1;SIRPG	7.97643
NMI	7.96496
SQSTM1	7.96421
CLN5	7.96281
TP53I3	7.96267
TLDC1	7.94034
PAFAH1B2	7.93908
POLR2B	7.93664
RGS10	7.92946
NEU1	7.92766
ETFB	7.92539
CBR3	7.91541
RALY	7.90622
NOLC1	7.88516
NDST1;NDST4;NDST3	7.88306
WDR77	7.86128
DCTD	7.84744
MRI1	7.84275
RAB1A;RAB1C	7.84195
SUPT5H	7.82327
PRRC2C	7.82087
LMNA	7.81772
ARMT1	7.81197
SPP1	7.80775
CNOT1	7.80357
PRPS1	7.79836
RPL17	7.79046
HEBP2	7.78064
DYNC1I2;DYNC1I1	7.77378
RNF213	7.77372
BCAT1	7.77255
FSTL3	7.75912
TUBB8	7.73867
PSMC6	7.73595
PPP6R3	7.72608
NFASC	7.70918
NADSYN1	7.70306
EIF4E	7.70142
BAIAP2	7.68941
CRABP2	7.64209
IFI16;PYHIN1	7.64052
PALLD	7.63012
FAM20C;FAM20A	7.62015
RBM25	7.61226
TPM2	7.59384
S100A13	7.58848
ADA	7.58786
ACIN1	7.58404
ALDH7A1	7.58382
REXO2	7.57522
ALDH3A1;ALDH3B2;ALDH3B1;ALDH3A2	7.56835
ITIH1	7.56059
S100A6	7.55656
RNASE7	7.55344
DEK	7.54833
LYPD3	7.53481
CUL2	7.5345
P4HA1	7.51978
HECTD1	7.50562
RPL26	7.50243
GEMIN5	7.49826
ADAM15	7.49321
COPS6	7.49097
SART1	7.48687
FUBP3	7.48388
PRSS3P2;PRSS2;PRSS1	7.47965
UBE2M	7.47758
CCDC124	7.44438
COL1A1	7.42637
DSG3	7.3994
EIF3K	7.39773
TKFC	7.38211
RBP1	7.38163
TUFM	7.37934
RALA	7.37562
CD81	7.37546
HSPA13	7.37527
OAS3	7.37341
BAG6	7.37042
OGFOD1	7.3463
TXNDC12	7.34498
LSM2	7.34474
TNFRSF12A	7.32342
EIF3H	7.32003
IRF6	7.31068
CSTF1	7.3106
ATP6V1B2;ATP6V1B1	7.29478
UROD	7.29113
AMPD2	7.29099
GTF2F1	7.27934
EDIL3	7.26989
IFIT1;IFIT1B	7.26055
CANX	7.25653
PPP6C	7.25636
YLPM1	7.24779
SORT1	7.24143
PIN4	7.23905
BAG2	7.23239
BARGIN;SH3BP1	7.22219
HIST2H3A;HIST3H3;H3F3A;HIST1H3A;H3F3C	7.21526
C12orf10	7.20953
AP1G1	7.2089
PUS7	7.20831
BTF3L4	7.20647
TOP2A	7.19616
LMAN2	7.17971
SCP2	7.15846
CFL2	7.15101
NT5C3A	7.14759
SEMA3C	7.14508
RPL8	7.13646
PFDN1	7.12844
CDK1;CDK3	7.12822
CXCL16	7.11843
HK2	7.11663
SMAP	7.10186
SNX1	7.0994
PFDN6	7.09865
NRG1	7.09024
EPS15L1	7.08753
VAT1	7.08481
TRIM16;TRIM16L	7.07023
PSME4	7.05674
UBE2H	7.04285
MEGF8	7.03144
COPS8	7.02067
RPL13	7.01829
APIP	7.00735
AP2A2	7.0051
PCBD1	6.9959
CIAO1	6.98855
IL18	6.97771
TXLNA;TXLNB	6.97338
PBDC1	6.97329
POLR2A	6.96647
IMPA1	6.94628
ITGA3	6.93271
LMAN1	6.90723
ADPRHL2	6.89419
ALDH2	6.89281
RPL38	6.88668
BCCIP	6.88235
ITGA2	6.85054
TENM2	6.84751
MTDH	6.84449
SF3A2	6.82134
SH3BGRL	6.81789
SRP19	6.79516
TOR1B	6.79118
	6.78686
RAB6A;RAB6B;RAB39A;RAB6C	6.78123
LAMP1	6.78021
VBP1	6.75608
POLR2H	6.75272
EPCAM	6.74627
SSSCA1	6.73253
RPS27;RPS27L	6.72731
EFNA1	6.72256
PPAT	6.71597
SEMA5A	6.7003
C1orf123	6.69994
LNPEP	6.67089
GALNT6	6.66999
EPS15	6.66628
CELSR2	6.66584
BTD	6.66336
NQO2	6.65426
PSPC1	6.64276
GYG1	6.63725
ANXA5	6.62524
CPSF1	6.62205
GALNT3	6.616
OSMR	6.60729
VPS28	6.59428
LUM	6.58591
NLE1	6.58531
PSMD8	6.57901
NUP37	6.57666
DCXR	6.5627
PCDHGC3	6.5462
DYNC1LI2	6.53592
PPME1	6.53563
GNPTG	6.51136
TAF15	6.49652
RPS25	6.49416
GBA	6.48696
GALNT10;GALNTL6	6.4654
PSMC4	6.4631
KYAT3	6.46028
ASNS	6.45456
CUTA	6.45141
COPS3	6.44252
TUBB6	6.44139
PPP4C	6.43926
LAMA4	6.42827
SRA1	6.42377
SSU72	6.40359
ROCK1	6.38768
MAP2K1	6.38075
USP39	6.37119
MT2A;MT1X;MT1G;MT1M;MT1E;MT1A	6.36648
DKC1	6.3601
EPHA2	6.35986
VEGFA	6.3409
SUMO1	6.34067
NIT1	6.34062
IGFL1	6.33609
TNFRSF21	6.33607
MRRF	6.3334
ENO2	6.33127
SNRPE	6.28161
STAG2	6.26038
PSMD7	6.25895
H2AFV;H2AFZ	6.24446
SDHA	6.2416
SLC39A10	6.23864
SECTM1	6.21868
CSNK2A1;CSNK2A3	6.21757
PSIP1	6.20896
GPHN	6.19983
PPIL3	6.1535
LRPAP1	6.15187
NPLOC4	6.14346
QPCT	6.14321
IDS	6.1386
CPNE3;CPNE5;CPNE2;CPNE4;CPNE6;CPNE7	6.13812
ERVMER34-1	6.13286
AP3B1;AP3B2	6.12053
GNB1;GNB3	6.1146
DPP7	6.11275
RPL7	6.10523
SRP72	6.10443
WFDC2	6.08647
CDC5L	6.08028
	6.06203
ELP1	6.05783
STC1	6.04819
DNM2	6.04796
AAMP	6.04209
CUL3	6.03308
ICAM5	6.02705
TRIM25	6.02522
KIF1BP	6.01483
CBX5	6.01079
CELSR1	6.0067
PEA15	6.00347
FKBP9;FKBP9P1	5.99521
CHMP4A	5.98365
SNX12	5.95383
CSRP2	5.94352
LARP1;LARP1B	5.94205
RRP9	5.93988
CHID1	5.92976
GINS3	5.9255
LRG1	5.92431
SEMA4D	5.90734
EIF2AK2	5.90501
POLR1A	5.90499
ATP6V1G1;ATP6V1G2	5.90488
BCLAF1	5.88322
GFPT1;GFPT2	5.87422
GALNT18	5.87392
ASL	5.86676
HIST1H1C	5.85825
DUSP3	5.85743
PPIE	5.85386
PAPOLA;PAPOLB;PAPOLG	5.84977
SEC13	5.83611
ARHGAP1	5.83606
PCYT1A;PCYT1B	5.82402
RBM14	5.81558
WDR82	5.77393
PAPPA	5.74774
UBLCP1	5.7387
RAP1B;RAP1A	5.73719
SEC22B	5.71255
ITGBL1	5.70712
HIBCH	5.70641
PLS1	5.70043
MYO1B;MYO1A	5.69947
SRPX2	5.69908
AIMP2	5.69557
UCHL5	5.69455
ZC3HAV1	5.69394
IST1	5.689
LAMP2	5.68513
	5.67831
RBBP9	5.67731
YWHAB	5.677
RABGGTA	5.66995
MAGEA4;MAGEA10;MAGEA9	5.6677
APRT	5.66484
EHD4	5.66124
UBE2S	5.65122
PKM	5.64767
PURB;PURG	5.63631
VAPB	5.63443
RPL7A	5.63384
ANG	5.62889
MFGE8	5.62799
SRM	5.62707
	5.62254
ATP6V1C1	5.6188
LYPLA1	5.60682
SERPINI1	5.60468
LANCL2	5.60199
MAP1B	5.59935
TOP1;TOP1MT	5.59555
RBX1	5.58418
PYM1	5.58324
ROBO1;ROBO2	5.5796
FAM50A;FAM50B	5.57826
HSPB11	5.57622
CUL4A	5.57023
EPB41L2	5.56669
ATOX1	5.56462
PPP2R2A;PPP2R2C;PPP2R2B;PPP2R2D	5.55781
SERPINB8;SERPINI2	5.55746
BAX	5.55488
THYN1	5.54896
RPL4	5.54332
RRM2;RRM2B	5.54281
CDH13	5.54006
NDRG1	5.53779
RABEPK	5.53597
PPP1CB	5.52424
PLAUR	5.50868
KLC1;KLC4	5.5057
UTRN	5.49682
USP10	5.4904
CSTF2	5.48994
HRAS	5.48047
SRSF2;SRSF8	5.47867
PDGFD	5.46982
RCN2	5.46843
MMP9	5.46419
DYNLRB1;DYNLRB2	5.45688
PNPT1	5.44852
TPM4	5.42824
CHST14	5.42642
ICAM1	5.42165
GCNT1	5.41014
TOMM34	5.40719
SEPHS1	5.39946
DIS3	5.39604
SH3GL1;SH3GL2	5.38914
ANP32E	5.38907
GTF2F2	5.38889
ACAT1	5.38543
RAB21	5.366
CUL5	5.36522
GINS4	5.34578
TRIP6	5.34296
C5	5.33914
XPO5	5.33509
PLA2G15	5.31948
IPO11	5.31902
FNTA	5.31289
GORASP2	5.31024
PTPN23	5.30737
CARM1	5.29991
PIR	5.27103
CCAR1	5.26816
TSG101	5.26549
ENSA	5.25793
AASDHPPT	5.25078
NOP2	5.25006
APOE	5.24978
AKR7A2;AKR7L;AKR7A3	5.23983
MSH2	5.23539
NUDT1	5.23478
CHCHD2;CHCHD2P9	5.21272
LSM6	5.18545
	5.18107
MVD	5.17338
DNAJA2	5.16577
ADAR	5.157
CXCL8	5.15314
RAD23A	5.15079
PLXNA1	5.14911
TTC37	5.147
SDF2L1	5.14002
ARFIP1	5.13521
AK3	5.12996
PTPN1	5.11593
SEC14L2;SEC14L3	5.10775
EIF4A2	5.10681
DCPS	5.10343
COL6A2	5.10228
TPMT	5.09472
NUDT9	5.09379
HLA-A	5.09359
SRRM2	5.0912
PROS1	5.08854
RPL9	5.08197
CCBE1	5.08044
C7	5.07581
RNASE4	5.07161
	5.07151
PRPF4	5.06348
MRTO4	5.0604
	5.0597
NECTIN2	5.05576
BSG	5.04692
NXN	5.04439
PPM1B	5.04059
LYAR	5.02967
CASK	5.02178
NENF	5.02145
STX12	5.0155
NBL1	5.00991
