# Supplementary material for: Secreted protein markers in oral squamous cell carcinoma (OSCC)
Source: Clin Proteomics. 2022 Feb 8;19:4. doi: 10.1186/s12014-022-09341-5 (PMC8903575; doi:10.1186/s12014-022-09341-5)
Supplement: Supplementary file 10 — Additional file 10: Table S9.106 Common Proteins in "Tumor vs NATs OSCC and HNSCC Cell line Secrotome" vs "salivary proteome healthy vs. OSCC dataset by Chu et al. [8], human salivary proteome by Sivadasan et al. [9] and normal salivary proteome dataset (https://salivaryproteome.nidcr.nih.gov/)." [file 12014_2022_9341_MOESM10_ESM.xlsx]

## Sheet: Additional file 10. Table S9
Additional file 10. Table S9
106 Common Proteins in "Tumor vs NATs OSCC and HNSCC Cell line Secrotome" vs "salivary proteome healthy vs. OSCC dataset by Chu et al., 2019, human salivary proteome by P. Sivadasan et al., 2015 and normal salivary proteome dataset (https://salivaryproteome.nidcr.nih.gov/)"
Common Proteins	Tumor vs NAT OSCC Fold changes	HNSCC Cell line Secrotome Average Counts	Frequency of Detection in 03 saliva datasets
LGALS3BP	2.53682	269.247	3
TARS	2.27475	148.75	3
AARS	2.40959	78.4665	3
PLOD1	3.45562	73.7244	3
PRKDC	3.18334	66.6513	3
RRBP1	2.09869	49.1987	3
ERAP1	2.23409	47.0794	3
CAD	4	45.0522	3
NPC2	2.49104	42.872	3
RPL5	2.31419	38.2864	3
COTL1	2.21395	37.857	3
HYOU1	2.05929	37.2673	3
GLG1	2.49256	33.7023	3
TJP1	2.30988	31.8642	3
SMC1A	2.54466	28.2598	3
STAT1	2.64306	27.9559	3
COPB1	2.37966	22.4424	3
PRDX4	2.50716	19.2606	3
DNAJC3	2.99329	17.5707	3
ARPC1B	2.0118	16.725	3
PPP1R12A	2.60846	14.4279	3
EML4	3.92568	11.0494	3
NUCB2	3.80071	8.80281	3
LMAN1	2.02745	6.90723	3
GFPT1	4	5.87422	3
IGF2R	3.99557	80.4401	2
MACF1	3.01127	74.6473	2
LTBP2	2.68395	64.9993	2
VPS35	2.11793	56.482	2
TNC	3.16777	51.1003	2
GALNT2	2.93015	49.0648	2
GART	2.54117	47.1445	2
SNRNP200	2.81751	40.3844	2
APEX1	2.14925	39.911	2
COPA	2.37047	38.7741	2
QARS	2.07197	29.367	2
CKAP5	3.24582	29.2352	2
HNRNPUL1	2.34088	28.9196	2
UPF1	2.95981	26.2689	2
SMC3	2.38426	26.0085	2
OAT	2.52524	25.9267	2
EIF3L	2.53188	25.6292	2
EFTUD2	2.2406	25.5105	2
TXNDC5	2.07621	20.7798	2
TES	2.92419	20.5417	2
EIF2S2	2.44788	18.6899	2
SDCBP	2.06222	18.1317	2
PAK2	2.13367	17.0215	2
SEC23A	2.16586	15.5445	2
SNX2	2.05671	14.6112	2
MX1	2.81881	14.4638	2
MYOF	2.12919	13.8858	2
DNAJB11	3.41389	13.414	2
PFDN2	2.75149	13.2879	2
GOLGB1	4	13.1894	2
BPNT1	2.29564	12.7077	2
RAD50	3.10428	11.2814	2
EHD1	2.405	11.1873	2
SWAP70	6.3168	10.5341	2
PSMB9	3.21222	10.3061	2
MYH10	2.65694	8.44979	2
LMAN2	2.11667	7.17971	2
ARHGAP1	2.01991	5.83606	2
RPL4	2.29226	5.54332	2
LARS	2.62544	25.201	2
CNPY2	3.10175	12.3774	2
LAMC2	2.54096	529.403	1
TPP2	2.33872	114.903	1
TPR	2.08012	90.0691	1
SF3B3	2.54945	69.9649	1
CARS	2.96944	58.2795	1
PTK7	2.55371	57.4278	1
UGGT1	2.1744	48.3876	1
HDLBP	2.20052	45.5059	1
COPB2	2.69873	41.8057	1
XPO1	2.34105	35.3761	1
THBS2	2.8943	34.1382	1
SF3B1	2.76387	30.4112	1
MANF	3.45991	26.1999	1
UBE2I	2.21118	23.6704	1
HCFC1	3.17211	22.2068	1
COPG1	2.8209	21.4673	1
SEC24C	2.66619	19.2601	1
LRP1	2.10179	18.7781	1
MAT2B	2.74539	16.116	1
COPE	2.82508	15.6502	1
SUMF2	2.34107	14.1753	1
PACSIN2	2.93934	13.7163	1
UNC45A	2.62275	13.3912	1
GOLGA3	3.81501	12.586	1
ACBD3	3.68742	12.1164	1
MYDGF	2.14882	12.051	1
PPIL1	2.38913	10.9672	1
GCN1	2.57088	9.86816	1
CLINT1	2.23091	9.68584	1
LRRC59	2.91032	8.59171	1
PALLD	2.32765	7.63012	1
S100A13	2.56388	7.58848	1
AP2A2	2.53237	7.0051	1
MTDH	2.67705	6.84449	1
NPLOC4	3.06301	6.14346	1
THYN1	2.78538	5.54896	1
KLC1	2.23916	5.5057	1
ADAR	2.19546	5.157	1
SDF2L1	2.80443	5.14002	1
SRSF1	2.21221	15.8021	1
