# Supplementary material for: Secreted protein markers in oral squamous cell carcinoma (OSCC)
Source: Clin Proteomics. 2022 Feb 8;19:4. doi: 10.1186/s12014-022-09341-5 (PMC8903575; doi:10.1186/s12014-022-09341-5)
Supplement: Supplementary file 11 — Additional file 11: Table S10. List of 205 differentially expressed up regulated proteins (P < 0.01) of OSCC tumor tissue vs. paired normal adjacent tissue predicted to be secreted, either via classical or non-classical secretion mechanisms and their subcellular localization [file 12014_2022_9341_MOESM11_ESM.xlsx]

## Sheet: 205 up regulated (p 0.01)
Additional file 11. Table S10
List of 205 differentially expressed proteins (p < .01) of OSCC tumor tissue vs. paired normal adjacent tissue predicted to be secreted, either via classical or non-classical secretion mechanisms and their Subcellular Localization
Up regulated	Signal Peptide (Sec/SPI)	Other	NN-score	Odds	Cleavage site	Subcellular Localization
AARS	0.0009	0.9991	0.402	0.781		Cytoplasm.
ACBD3	0.0013	0.9987	0.524	1.225		Golgi apparatus membrane
ADAR	0.0014	0.9986	0.278	0.522		Cytoplasm
AGPS	0.0016	0.9984	0.318	0.616		Peroxisome membrane. Peroxisome.
AGR2	0.9945	0.0055	0.629	1.633	Cleavage site between pos. 20 and 21: TLA-RD. Probability: 0.9176	Secreted. Endoplasmic reticulum
ALDH18A1	0.0007	0.9993	0.619	1.534		Mitochondrion inner membrane
ALDH1L2	0.0015	0.9985	0.505	1.073		Mitochondrion.
ALPL	0.9448	0.0552	0.584	1.331	Cleavage site between pos. 17 and 18: TNS-LV. Probability: 0.7177	Cell membrane
AP2A2	0.0022	0.9978	0.444	0.855		Cell membrane
AP3M1	0.008	0.992	0.575	1.27		Golgi apparatus
APEX1	0.0047	0.9953	0.655	1.729		Nucleus
ARHGAP1	0.0004	0.9996	0.48	0.958		Cytoplasm.
ARPC1B	0.009	0.991	0.222	0.431		Cytoplasm, cytoskeleton. Nucleus
ATXN10	0.0012	0.9988	0.429	0.832		Cytoplasm, perinuclear region.
BPNT1	0.0044	0.9956	0.682	1.908		Nuclear speckles
CAD	0.0021	0.9979	0.179	0.362		Cytoplasm
CARS	0.0019	0.9981	0.177	0.356		Nucleus
CCDC47	0.9958	0.0042	0.31	0.573	Cleavage site between pos. 20 and 21: SEA-KF. Probability: 0.9015	Rough endoplasmic reticulum membrane
CD38	0.0025	0.9975	0.847	4.37		Membrane. Single-pass type II membrane protein.
CKAP5	0.0003	0.9997	0.195	0.382		Cytoplasm, cytoskeleton
CLINT1	0.0011	0.9989	0.074	0.171		Cytoplasm
CNPY2	0.9986	0.0014	0.961	7.211	Cleavage site between pos. 20 and 21: AWA-RR. Probability: 0.9750	Endoplasmic reticulum.
COLGALT1	0.9793	0.0207	0.759	2.636	Cleavage site between pos. 36 and 37: ADA-YF. Probability: 0.6276	Endoplasmic reticulum lumen
COPA	0.0009	0.9991	0.447	0.932		Membrane. Multi-pass membrane protein.
COPB1	0.0012	0.9988	0.416	0.813		Cytoplasm. Golgi apparatus membrane
COPB2	0.0006	0.9994	0.458	0.932		Cytoplasm, cytosol.
COPE	0.0025	0.9975	0.295	0.551		Cytoplasm
COPG1	0.0009	0.9991	0.381	0.738		Cytoplasm
CORO7	0.001	0.999	0.313	0.58		Mitochondria
COTL1	0.0018	0.9982	0.765	2.965		Cytoplasm
CRTAP	0.9383	0.0617	0.578	1.327	Cleavage site between pos. 26 and 27: GRA-QY. Probability: 0.4731	Secreted, extracellular space, extracellular matrix
CSK	0.0024	0.9976	0.431	0.824		Cytoplasm
DGKA	0.0003	0.9997	0.398	0.773		Cytoplasm, cytosol.
DNAJB11	0.8452	0.1548	0.707	2.494	Cleavage site between pos. 22 and 23: VIA-GR. Probability: 0.5316	Endoplasmic reticulum lumen
DNAJC3	0.623	0.377	0.38	0.705	Cleavage site between pos. 31 and 32: AEC-GV. Probability: 0.3202	Endoplasmic reticulum
EFTUD2	0.0004	0.9996	0.538	1.22		Nucleus
EHD1	0.0012	0.9988	0.319	0.59		Recycling endosome membrane
EIF2AK2	0.0002	0.9998	0.339	0.63		Cytoplasm. Nucleus. Cytoplasm, perinuclear region
EIF2S2	0.0001	0.9999	0.399	0.774		Endoplasmic reticulum
EIF3L	0.0007	0.9993	0.383	0.718		Cytoplasm.
EML4	0.0007	0.9993	0.344	0.644		Cytoplasm, cytoskeleton.
EPB41L3	0.0007	0.9993	0.177	0.354		Cytoplasm, cytoskeleton
ERAP1	0.8179	0.1821	0.562	1.262	Cleavage site between pos. 32 and 33: SWC-QS. Probability: 0.4356	Endoplasmic reticulum membrane. Single-pass type II membrane protein
EVL	0.0007	0.9993	0.712	2.27		Cytoplasm, cytoskeleton.
FAP	0.1641	0.8359	0.731	2.262		Cell junction, adherens junction
FBL	0.005	0.995	0.44	0.849		Nucleus, nucleolus
FBLIM1	0.0098	0.9902	0.603	1.651		Cell junction, focal adhesion
FERMT3	0.0006	0.9994	0.223	0.43		Cell projection, podosome
FKBP10	0.9715	0.0285	0.589	1.44	Cleavage site between pos. 28 and 29: AVG-RG. Probability: 0.2891	Endoplasmic reticulum lumen
FKBP11	0.9981	0.0019	0.287	0.55	Cleavage site between pos. 25 and 26: CRA-EA. Probability: 0.5582	Membrane. Single-pass membrane protein
FOLR2	0.9995	0.0005	0.629	1.544	Cleavage site between pos. 21 and 22: CSA-QD. Probability: 0.9402	Cell membrane. Lipid-anchor, GPI-anchor. Secreted.
GALNT2	0.2634	0.7366	0.647	1.672		Golgi apparatus. Secreted
GART	0.0017	0.9983	0.526	1.125		Cytosol
GCN1	0.0007	0.9993	0.226	0.434		Cytoplasm
GFPT1	0.0006	0.9994	0.473	0.935		Nucleoli
GLG1	0.9334	0.0666	0.352	0.667	Cleavage site between pos. 27 and 28: AGA-EK. Probability: 0.6774	Golgi apparatus membrane. Single-pass type I membrane protein
GMPPB	0.0042	0.9958	0.655	1.69		Cytoplasm.
GOLGA3	0.0027	0.9973	0.186	0.371		Cytoplasm. Golgi apparatus
GOLGB1	0.004	0.996	0.226	0.436		Golgi apparatus membrane. Single-pass type I membrane protein
HCFC1	0.002	0.998	0.386	0.73		Cytoplasm. Nucleus
HCLS1	0.0017	0.9983	0.131	0.281		Membrane
HDLBP	0.0021	0.9979	0.241	0.46		Cytoplasm. Nucleus.
HNRNPUL1	0.0006	0.9994	0.106	0.231		Nucleus.
HP1BP3	0.0027	0.9973	0.137	0.289		Nucleus
HYOU1	0.762	0.238	0.221	0.428	Cleavage site between pos. 30 and 31: ALS-DT. Probability: 0.3578	Endoplasmic reticulum lumen
IFI16	0.0004	0.9996	0.165	0.338		Nucleus
IGF2R	0.999	0.001	0.565	1.319	Cleavage site between pos. 42 and 43: AQA-AP. Probability: 0.6104	Lysosome membrane
IKBIP	0.0009	0.9991	0.697	2.021		Endoplasmic reticulum membrane. Single-pass membrane protein
IQGAP2	0.0005	0.9995	0.454	0.928		Plasma membrane
ITGA3	0.9307	0.0693	0.446	0.87	Cleavage site between pos. 32 and 33: VSA-FN. Probability: 0.7113	Cell membrane. Single-pass type I membrane protein
KIAA1217	0.0006	0.9994	0.264	0.497		Cytoplasm.
KLC1	0.0003	0.9997	0.36	0.68		Cell projection, growth cone
LAMC2	0.9988	0.0012	0.379	0.713	Cleavage site between pos. 21 and 22: ARA-TS. Probability: 0.8252	Secreted, extracellular matrix
LAMTOR3	0.0006	0.9994	0.507	1.073		Late endosome membrane
LARS	0.0007	0.9993	0.204	0.399		Cell membrane. Single-pass type I membrane protein
LGALS3BP	0.9892	0.0108	0.738	2.397	Cleavage site between pos. 18 and 19: TQG-VN. Probability: 0.9067	Secreted. Secreted, extracellular matrix
LMAN1	0.9252	0.0748	0.589	1.437	Cleavage site between pos. 30 and 31: VRG-DG. Probability: 0.8410	Endoplasmic reticulum-Golgi intermediate compartment membrane
LMAN2	0.9621	0.0379	0.222	0.438	Cleavage site between pos. 44 and 45: VTA-DI. Probability: 0.9073	Endoplasmic reticulum-Golgi intermediate compartment membrane
LRP1	0.9994	0.0006	0.609	1.449	Cleavage site between pos. 20 and 21: AAA-ID. Probability: 0.4677	Cell membrane. Single-pass type I membrane protein
LRRC59	0.0008	0.9992	0.655	1.943		Microsome membrane
LSP1	0.0005	0.9995	0.425	0.804		Cell membrane. Peripheral membrane protein. Cytoplasmic side.
LTBP2	0.9175	0.0825	0.389	0.741	Cleavage site between pos. 35 and 36: GHA-QR. Probability: 0.8132	Secreted, extracellular space, extracellular matrix.
M6PR	0.9628	0.0372	0.233	0.452	Cleavage site between pos. 26 and 27: SWQ-TE. Probability: 0.3051	Lysosome membrane. Single-pass type I membrane protein
MACF1	0.0009	0.9991	0.259	0.493		Cytoplasm, cytoskeleton
MANF	0.9963	0.0037	0.75	2.671	Cleavage site between pos. 24 and 25: SRA-LR. Probability: 0.9443	Secreted. Endoplasmic reticulum lumen.
MAT2B	0.0023	0.9977	0.519	1.09		Plasma membrane
MOGS	0.0271	0.9729	0.388	0.723		Cell membrane. Multi-pass membrane protein
MRC2	0.9225	0.0775	0.588	1.393	Cleavage site between pos. 33 and 34: GAP-GD. Probability: 0.2135	Membrane. Single-pass type I membrane protein
MTDH	0.001	0.999	0.403	0.777		Endoplasmic reticulum membrane. Single-pass membrane protein
MUC5B	0.9902	0.0098	0.798	3.178	Cleavage site between pos. 25 and 26: AET-QG. Probability: 0.7430	Secreted.
MX1	0.0034	0.9966	0.211	0.411		Cytoplasm
MXRA7	0.4434	0.5566	0.663	2.027		Nucleoplasm
MYDGF	0.9759	0.0241	0.906	5.87	Cleavage site between pos. 31 and 32: AEA-VS. Probability: 0.8239	Secreted. Endoplasmic reticulum-Golgi intermediate compartment
MYH10	0.0005	0.9995	0.343	0.653		Cell projection, lamellipodium
MYO1B	0.0004	0.9996	0.378	0.699		Plasma membrane
MYO1G	0.0001	0.9999	0.458	0.928		Cell membrane
MYOF	0.0007	0.9993	0.192	0.379		Cell membrane. Single-pass type II membrane protein
MZB1	0.9991	0.0009	0.954	7.237	Cleavage site between pos. 22 and 23: GLG-DR. Probability: 0.6478	Endoplasmic reticulum lumen. Secreted
NOP58	0.0018	0.9982	0.161	0.329		Nucleus, nucleolus. Nucleus, nucleoplasm.
NPC2	0.9998	0.0002	0.931	6.67	Cleavage site between pos. 19 and 20: AQA-EP. Probability: 0.9119	Secreted. Endoplasmic reticulum. Lysosome
NPLOC4	0.0003	0.9997	0.522	1.138		Cytoplasm
NUCB2	0.9898	0.0102	0.332	0.61	Cleavage site between pos. 24 and 25: LEA-VP. Probability: 0.8092	Golgi apparatus
OAS2	0.0009	0.9991	0.396	0.763		Cytoplasm. Cytoplasm, perinuclear region.
OAT	0.0048	0.9952	0.452	0.882		Mitochondrion matrix.
P3H1	0.9852	0.0148	0.805	3.572	Cleavage site between pos. 22 and 23: SQA-EV. Probability: 0.6067	Endoplasmic reticulum
P4HA1	0.9848	0.0152	0.781	2.942	Cleavage site between pos. 17 and 18: SLA-HP. Probability: 0.8664	Endoplasmic reticulum lumen
PACSIN2	0.0014	0.9986	0.522	1.136		Cytoplasm
PAK2	0.0003	0.9997	0.414	0.787		Cytoplasm
PALLD	0.0004	0.9996	0.199	0.391		Cytoplasm, cytoskeleton
PARP1	0.0005	0.9995	0.192	0.379		Nucleus
PDIA5	0.9644	0.0356	0.475	0.914	Cleavage site between pos. 24 and 25: SSA-KV. Probability: 0.6988	Endoplasmic reticulum lumen.
PECAM1	0.992	0.008	0.19	0.387	Cleavage site between pos. 27 and 28: LEG-QE. Probability: 0.8138	Cell membrane. Single-pass type I membrane protein
PFDN2	0.0002	0.9998	0.583	1.476		Nucleus
PLOD1	0.9993	0.0007	0.573	1.308	Cleavage site between pos. 18 and 19: AEA-KG. Probability: 0.5806	Rough endoplasmic reticulum membrane
PLSCR1	0.0084	0.9916	0.835	4.383		Cell membrane. Single-pass type II membrane protein
PNPT1	0.0007	0.9993	0.456	0.888		Cytoplasm. Mitochondrion matrix
PPIL1	0.0005	0.9995	0.309	0.574		Nucleoli
PPP1R12A	0.0009	0.9991	0.074	0.168		Cytoplasm
PPP1R18	0.001	0.999	0.069	0.161		Cytoplasm, cytoskeleton.
PRDX4	0.9838	0.0162	0.724	2.546	Cleavage site between pos. 37 and 38: VQG-WE. Probability: 0.8042	Cytoplasm
PRKDC	0.0027	0.9973	0.348	0.65		Nucleus
PRPF8	0.0005	0.9995	0.32	0.597		Nucleus. Nucleus speckle.
PSMB9	0.0054	0.9946	0.557	1.283		Cytoplasm. Nucleus.
PTK7	0.9574	0.0426	0.601	1.478	Cleavage site between pos. 30 and 31: TQT-AI. Probability: 0.8001	Membrane. Single-pass type I membrane protein
PTPN1	0.0006	0.9994	0.34	0.622		Endoplasmic reticulum membrane
PTPN6	0.0018	0.9982	0.352	0.666		Cytoplasm
PTPRC	0.8318	0.1682	0.466	0.982	Cleavage site between pos. 25 and 26: VTG-QS. Probability: 0.3716	Cell membrane
PYCR1	0.0419	0.9581	0.495	0.989		Mitochondrion.
QARS	0.0031	0.9969	0.42	0.812		Cytoplasm, cytosol. Cytoplasm
RAB35	0.001	0.999	0.34	0.776		Cell membrane
RAD50	0.0029	0.9971	0.189	0.375		Nucleus
RANBP2	0.0015	0.9985	0.309	0.575		Nucleus
RBM39	0.0002	0.9998	0.383	0.884		Nucleus speckle
RCC1	0.0051	0.9949	0.573	1.473		Nucleus
RCN3	0.999	0.001	0.95	7.3	Cleavage site between pos. 20 and 21: AQG-KP. Probability: 0.9839	Endoplasmic reticulum lumen.
RECQL	0.0005	0.9995	0.4	0.746		Nucleus
RFTN1	0.0009	0.9991	0.497	0.993		Cell membrane
RPL4	0.0017	0.9983	0.24	0.475		Cytosol
RPL5	0.0005	0.9995	0.413	0.784		Cytoplasm. Nucleus, nucleolus
RPS27	0.0012	0.9988	0.452	1.147		Cytosol
RRBP1	0.0058	0.9942	0.573	1.326		Endoplasmic reticulum membrane. Single-pass type III membrane protein
S100A13	0.0002	0.9998	0.369	0.981		Cytoplasm. Secreted
SCAMP1	0.0009	0.9991	0.273	0.607		Golgi apparatus, trans-Golgi network membrane
SCAMP3	0.0011	0.9989	0.224	0.437		Membrane
SDCBP	0.0013	0.9987	0.232	0.456		Cell junction, focal adhesion
SDF2L1	0.9923	0.0077	0.926	6.391	Cleavage site between pos. 28 and 29: GGA-AK. Probability: 0.5149	Endoplasmic reticulum lumen
SEC11C	0.0012	0.9988	0.905	5.795		Microsome membrane. Single-pass type II membrane protein
SEC13	0.002	0.998	0.649	1.623		Cytoplasmic vesicle, COPII-coated vesicle membrane
SEC16A	0.0041	0.9959	0.652	1.658		Endoplasmic reticulum membrane
SEC23A	0.0015	0.9985	0.612	1.51		Cytoplasmic vesicle, COPII-coated vesicle membrane
SEC23B	0.0017	0.9983	0.579	1.325		Cytoplasmic vesicle, COPII-coated vesicle membrane
SEC23IP	0.0008	0.9992	0.398	0.739		Cytoplasmic vesicle, COPII-coated vesicle membrane
SEC24C	0.0051	0.9949	0.636	1.589		Cytoplasmic vesicle, COPII-coated vesicle membrane
SEC24D	0.0023	0.9977	0.577	1.282		ytoplasmic vesicle, COPII-coated vesicle membrane.
SEC61A1	0.0015	0.9985	0.798	3.658		Endoplasmic reticulum membrane
SEPT6	0.0011	0.9989	0.097	0.215		Cytoplasm
SERPINB9	0.0036	0.9964	0.559	1.189		Cytoplasm
SF3B1	0.0007	0.9993	0.494	0.981		Nucleus
SF3B3	0.0073	0.9927	0.732	2.354		Nucleus.
SLC25A22	0.0098	0.9902	0.746	2.492		Mitochondrion inner membrane. Multi-pass membrane protein.
SMARCA5	0.0006	0.9994	0.217	0.42		Nucleus
SMC1A	0.0003	0.9997	0.249	0.474		Nucleus
SMC3	0.0013	0.9987	0.115	0.251		Nucleus
SNRNP200	0.0003	0.9997	0.204	0.397		Nucleus.
SNX2	0.0003	0.9997	0.508	1.106		Early endosome membrane
SPCS1	0.0023	0.9977	0.201	0.394		Cytoplasm
SQOR	0.035	0.96	0.556	1.219		Mitochondrion
SRP72	0.0021	0.9979	0.087	0.197		Cytoplasm. Endoplasmic reticulum.
SRPRA	0.2222	0.7778	0.24	0.461		Endoplasmic reticulum membrane
SRRT	0.002	0.998	0.231	0.441		Nucleus, nucleoplasm
SRSF1	0.0007	0.9993	0.233	0.479		Cytoplasm
SRSF9	0.0009	0.9991	0.408	0.792		Nucleus
STAB1	0.9973	0.0027	0.454	0.871	Cleavage site between pos. 25 and 26: VRG-QV. Probability: 0.9212	Membrane. Single-pass type I membrane protein
STAT1	0.0005	0.9995	0.405	0.776		Cytoplasm. Nucleus
STIM1	0.9925	0.0075	0.554	1.423	Cleavage site between pos. 22 and 23: GQS-LS. Probability: 0.5875	Cell membrane
STT3A	0.0131	0.9869	0.464	1.043		Endoplasmic reticulum
STXBP2	0.0008	0.9992	0.306	0.574		Cytosol
SUMF2	0.9735	0.0265	0.796	3.16	Cleavage site between pos. 25 and 26: GNG-QA. Probability: 0.7398	Endoplasmic reticulum lumen
SURF4	0.0008	0.9992	0.679	1.933		Endoplasmic reticulum membrane
SWAP70	0.0036	0.9964	0.13	0.275		Cytoplasm
TAP2	0.0292	0.9708	0.844	4.768		Endoplasmic reticulum membrane
TARS	0.0014	0.9986	0.337	0.636		Nucleus. Nucleus speckle
TES	0.0011	0.9989	0.407	0.765		Cytoplasm
TFG	0.0006	0.9994	0.301	0.565		Nucleoplasm
TFRC	0.0029	0.9971	0.611	1.514		Cell membrane
THBS2	0.9985	0.0015	0.529	1.129	Cleavage site between pos. 18 and 19: TQA-GH. Probability: 0.9524	Cytosol
THYN1	0.0009	0.9991	0.692	1.984		Nucleus.
TJP1	0.0018	0.9982	0.343	0.633		Cell membrane
TM9SF2	0.9784	0.0216	0.563	1.338	Cleavage site between pos. 35 and 36: SGA-FY. Probability: 0.6184	Endosome membrane. Multi-pass membrane protein. Postsynaptic Golgi apparatus. Cytoplasm, cytoskeleton, microtubule organizing center
TM9SF3	0.9933	0.0067	0.472	1.028	Cleavage site between pos. 28 and 29: TRA-DE. Probability: 0.9841	Membrane. Multi-pass membrane protein.
TM9SF4	0.9951	0.0049	0.449	0.903	Cleavage site between pos. 23 and 24: TSA-FY. Probability: 0.9511	Membrane. Multi-pass membrane protein
TMEM165	0.9909	0.0091	0.584	1.353	Cleavage site between pos. 33 and 34: VRA-GP. Probability: 0.8900	Golgi apparatus membrane
TNC	0.9765	0.0235	0.49	0.992	Cleavage site between pos. 22 and 23: TEG-GV. Probability: 0.7806	Secreted, extracellular space, extracellular matrix
TPP2	0.0012	0.9988	0.535	1.212		Cytoplasm. Nucleus
TPR	0.0005	0.9995	0.141	0.295		Nucleus
TUBG1	0.0014	0.9986	0.499	0.991		Cytoplasm, cytoskeleton, microtubule organizing center, centrosome.
TXNDC5	0.7913	0.2087	0.657	1.91	Cleavage site between pos. 31 and 32: GGG-GR. Probability: 0.2074	Endoplasmic reticulum lumen
UBE2I	0.0035	0.9965	0.749	2.707		Nucleus
UGGT1	0.5703	0.4297	0.688	1.969	Cleavage site between pos. 42 and 43: VKA-DS. Probability: 0.5077	Endoplasmic reticulum
UNC45A	0.0036	0.9964	0.434	0.827		Cytoplasm
UPF1	0.0019	0.9981	0.463	0.903		Cytoplasm
VCAN	0.8168	0.1832	0.703	2.141	Cleavage site between pos. 20 and 21: THA-LH. Probability: 0.7582	Secreted, extracellular matrix
VPS35	0.0005	0.9995	0.566	1.285		Cytoplasm
XPO1	0.0019	0.9981	0.561	1.29		Cytoplasm
ZC3HAV1	0.0028	0.9972	0.279	0.522		Cytoplasm. Nucleus.
